# Supplementary material for: Identification of Genetic Determinants and Enzymes Involved with the Amidation of Glutamic Acid Residues in the Peptidoglycan of Staphylococcus aureus
Source: PubMed Central journal article supplement (PMC3267633; doi:10.1371/journal.ppat.1002508), 2012-01-26

Figure S3

**A**

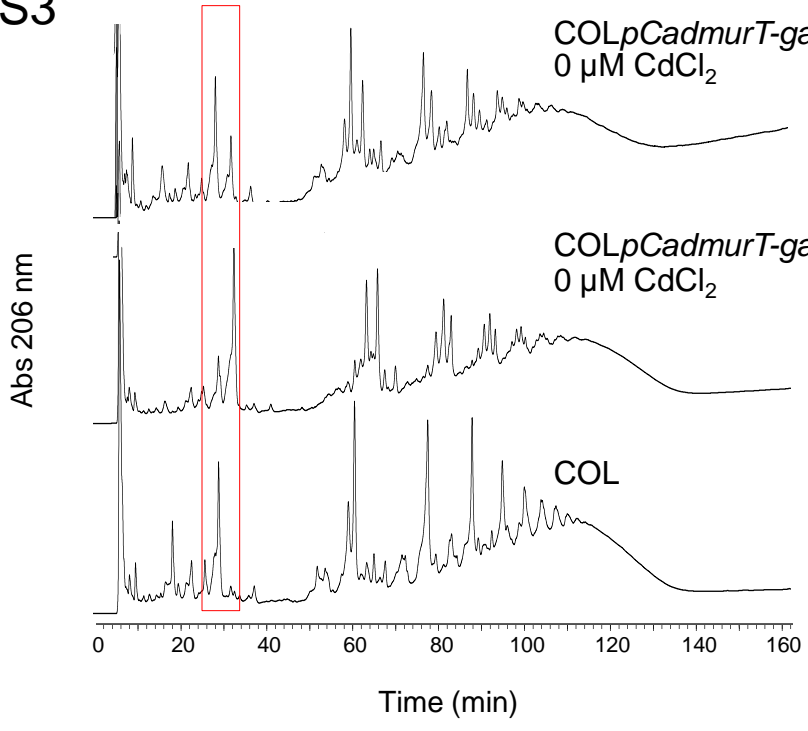

**B**

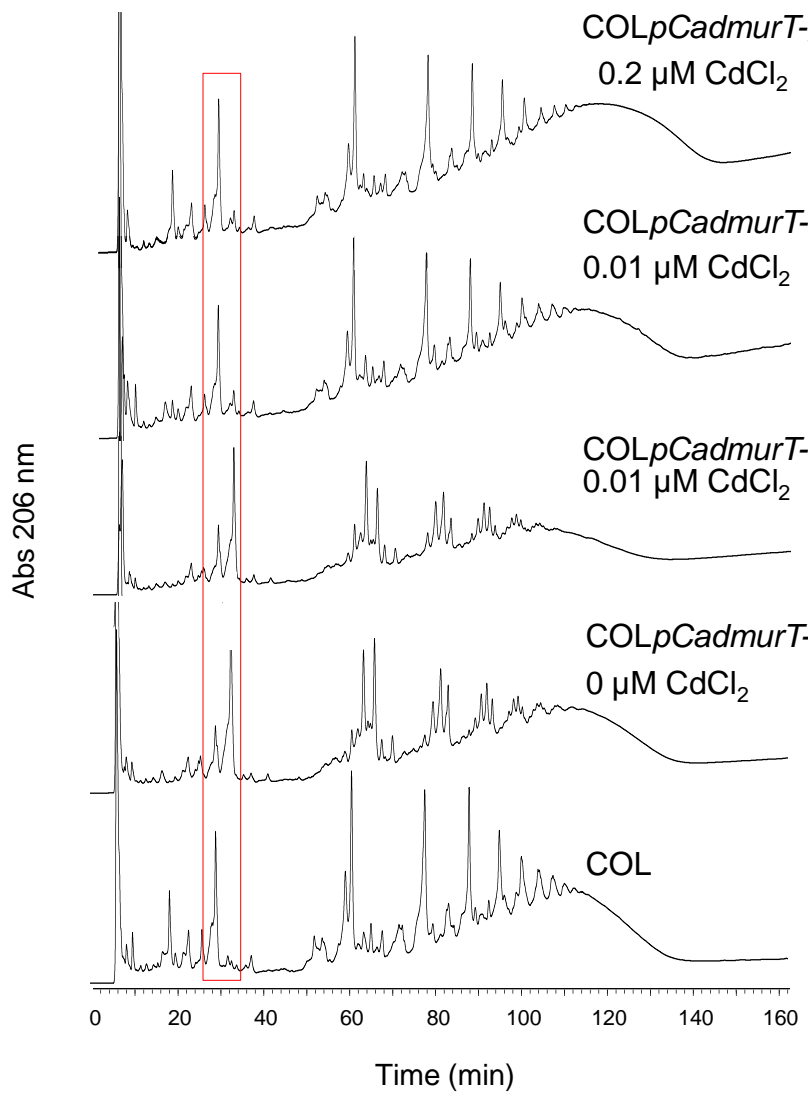

Supplement: ppat.1002508.s003.pdf [file ppat.1002508.s003.pdf]
